# Supplementary material for: Systems Genomics of Thigh Adipose Tissue From Asian Indian Type-2 Diabetics Revealed Distinct Protein Interaction Hubs
Source: Front Genet. 2019 Jan 8;9:679. doi: 10.3389/fgene.2018.00679 (PMC6331691; doi:10.3389/fgene.2018.00679)
Supplement: Supplementary file 2 [file Table_2.xls]

## Sheet: Supplementary_Table_2
Uniprot id	Description	Pathways	Nodes	Connecting edges
P06959	HUMAN|HGNC=1582|UniProtKB=P24385,HUMAN|HGNC=6880|UniProtKB=Q13164,HUMAN|HGNC=8816|UniProtKB=O15530,HUMAN|HGNC=7980|UniProtKB=P22736,HUMAN|HGNC=6872|UniProtKB=P53779,HUMAN|HGNC=12841|UniProtKB=P07947,HUMAN|HGNC=11283|UniProtKB=P12931,HUMAN|HGNC=667|UniProtKB=P61586,HUMAN|HGNC=6735|UniProtKB=P07948,HUMAN|HGNC=6846|UniProtKB=P52564,HUMAN|HGNC=1504|UniProtKB=P42574,HUMAN|HGNC=992|UniProtKB=Q07817,HUM…	CCKR signaling map	290	171	171
P06664	HUMAN|HGNC=7421|UniProtKB=P00403,HUMAN|HGNC=465|UniProtKB=Q16671,HUMAN|HGNC=433|UniProtKB=P16050,HUMAN|HGNC=7980|UniProtKB=P22736,HUMAN|HGNC=11283|UniProtKB=P12931,HUMAN|HGNC=6843|UniProtKB=P46734,HUMAN|HGNC=6846|UniProtKB=P52564,HUMAN|HGNC=9004|UniProtKB=P78337,HUMAN|HGNC=6848|UniProtKB=Q13233,HUMAN|HGNC=1074|UniProtKB=P18075,HUMAN|HGNC=6851|UniProtKB=Q12852,HUMAN|HGNC=24188|UniProtKB=Q9BRK5,HUM…	Gonadotropin releasing hormone receptor pathway	216	234	236
P06587	HUMAN|HGNC=9282|UniProtKB=P62140,HUMAN|HGNC=9380|UniProtKB=P17612,HUMAN|HGNC=3754|UniProtKB=P21333,HUMAN|HGNC=9281|UniProtKB=P62136,HUMAN|HGNC=9287|UniProtKB=Q9UD71,HUMAN|HGNC=4566|UniProtKB=P62993	Nicotine pharmacodynamics pathway	27	39	170
P06216	HUMAN|HGNC=9279|UniProtKB=Q9P0J1	SCW_signaling_pathway	18	13	13
P06214	HUMAN|HGNC=9279|UniProtKB=Q9P0J1	GBB_signaling_pathway	17	12	12
P06213	HUMAN|HGNC=9279|UniProtKB=Q9P0J1	DPP_signaling_pathway	19	14	14
P06212	HUMAN|HGNC=9279|UniProtKB=Q9P0J1	DPP-SCW_signaling_pathway	21	16	16
P06211	HUMAN|HGNC=9279|UniProtKB=Q9P0J1	BMP_signaling_pathway-drosophila	19	21	22
P05918	HUMAN|HGNC=6857|UniProtKB=Q99683,HUMAN|HGNC=6843|UniProtKB=P46734,HUMAN|HGNC=7111|UniProtKB=Q9HBH9,HUMAN|HGNC=6846|UniProtKB=P52564,HUMAN|HGNC=783|UniProtKB=P18846,HUMAN|HGNC=6856|UniProtKB=Q9Y6R4,HUMAN|HGNC=5993|UniProtKB=P14778,HUMAN|HGNC=9802|UniProtKB=P15153,HUMAN|HGNC=7110|UniProtKB=Q9BUB5,HUMAN|HGNC=24615|UniProtKB=O00418,HUMAN|HGNC=6844|UniProtKB=P45985,HUMAN|HGNC=6887|UniProtKB=P49137,HUM…	p38 MAPK pathway	36	47	234
P05917	HUMAN|HGNC=4412|UniProtKB=O14610,HUMAN|HGNC=12643|UniProtKB=P63027,HUMAN|HGNC=11131|UniProtKB=O00161,HUMAN|HGNC=4389|UniProtKB=P09471,HUMAN|HGNC=11438|UniProtKB=Q13277,HUMAN|HGNC=19664|UniProtKB=Q9UK08	Opioid proopiomelanocortin pathway	9	46	331
P05916	HUMAN|HGNC=4412|UniProtKB=O14610,HUMAN|HGNC=12643|UniProtKB=P63027,HUMAN|HGNC=11131|UniProtKB=O00161,HUMAN|HGNC=4389|UniProtKB=P09471,HUMAN|HGNC=11438|UniProtKB=Q13277,HUMAN|HGNC=19664|UniProtKB=Q9UK08	Opioid prodynorphin pathway	12	47	326
P05915	HUMAN|HGNC=4412|UniProtKB=O14610,HUMAN|HGNC=12643|UniProtKB=P63027,HUMAN|HGNC=11131|UniProtKB=O00161,HUMAN|HGNC=11438|UniProtKB=Q13277,HUMAN|HGNC=19664|UniProtKB=Q9UK08	Opioid proenkephalin pathway	11	46	323
P05914	HUMAN|HGNC=12536|UniProtKB=P22310,HUMAN|HGNC=12537|UniProtKB=P35504,HUMAN|HGNC=12535|UniProtKB=P35503	Nicotine degradation	6	6	20
P05913	HUMAN|HGNC=9391|UniProtKB=P13861,HUMAN|HGNC=4412|UniProtKB=O14610,HUMAN|HGNC=9380|UniProtKB=P17612,HUMAN|HGNC=4389|UniProtKB=P09471,HUMAN|HGNC=19664|UniProtKB=Q9UK08,HUMAN|HGNC=9441|UniProtKB=P51817	Enkephalin release	10	49	334
P05912	HUMAN|HGNC=9391|UniProtKB=P13861,HUMAN|HGNC=9380|UniProtKB=P17612,HUMAN|HGNC=11131|UniProtKB=O00161,HUMAN|HGNC=3380|UniProtKB=Q9Y2J2,HUMAN|HGNC=4403|UniProtKB=P61952,HUMAN|HGNC=19664|UniProtKB=Q9UK08,HUMAN|HGNC=9441|UniProtKB=P51817,HUMAN|HGNC=9282|UniProtKB=P62140,HUMAN|HGNC=12643|UniProtKB=P63027,HUMAN|HGNC=5301|UniProtKB=P50406,HUMAN|HGNC=3754|UniProtKB=P21333,HUMAN|HGNC=11438|UniProtKB=Q13277…	Dopamine receptor mediated signaling pathway	27	83	450
P05911	HUMAN|HGNC=336|UniProtKB=P30556,HUMAN|HGNC=4412|UniProtKB=O14610,HUMAN|HGNC=4403|UniProtKB=P61952,HUMAN|HGNC=19664|UniProtKB=Q9UK08,HUMAN|HGNC=4390|UniProtKB=P50148,HUMAN|HGNC=6877|UniProtKB=P27361,HUMAN|HGNC=4544|UniProtKB=P34947,HUMAN|HGNC=667|UniProtKB=P61586	Angiotensin II-stimulated signaling through G proteins and beta-arrestin	21	40	268
P05734	HUMAN|HGNC=11509|UniProtKB=P21579,HUMAN|HGNC=12643|UniProtKB=P63027,HUMAN|HGNC=18638|UniProtKB=Q5T7P8,HUMAN|HGNC=11444|UniProtKB=P61764	Synaptic_vesicle_trafficking	12	32	169
P05731	HUMAN|HGNC=9391|UniProtKB=P13861,HUMAN|HGNC=4412|UniProtKB=O14610,HUMAN|HGNC=9380|UniProtKB=P17612,HUMAN|HGNC=4389|UniProtKB=P09471,HUMAN|HGNC=4403|UniProtKB=P61952,HUMAN|HGNC=19664|UniProtKB=Q9UK08,HUMAN|HGNC=9388|UniProtKB=P10644,HUMAN|HGNC=9441|UniProtKB=P51817,HUMAN|HGNC=9390|UniProtKB=P31321,HUMAN|HGNC=239|UniProtKB=P40145	GABA-B_receptor_II_signaling	9	43	251
P05730	HUMAN|HGNC=4412|UniProtKB=O14610,HUMAN|HGNC=4389|UniProtKB=P09471,HUMAN|HGNC=4403|UniProtKB=P61952,HUMAN|HGNC=19664|UniProtKB=Q9UK08	Endogenous_cannabinoid_signaling	9	26	173
P05728	HUMAN|HGNC=3553|UniProtKB=O00519	Anandamide_degradation	1	1	5
P05726	HUMAN|HGNC=6677|UniProtKB=P06858	2-arachidonoylglycerol biosynthesis	4	7	36
P04398	HUMAN|HGNC=9893|UniProtKB=P28749,HUMAN|HGNC=1589|UniProtKB=P24864,HUMAN|HGNC=15979|UniProtKB=Q9H3D4,HUMAN|HGNC=1592|UniProtKB=P51959,HUMAN|HGNC=11998|UniProtKB=P04637,HUMAN|HGNC=1578|UniProtKB=P20248,HUMAN|HGNC=8816|UniProtKB=O15530,HUMAN|HGNC=391|UniProtKB=P31749,HUMAN|HGNC=9299|UniProtKB=P67775,HUMAN|HGNC=3115|UniProtKB=O00716,HUMAN|HGNC=12003|UniProtKB=O15350,HUMAN|HGNC=1771|UniProtKB=P24941,H…	p53 pathway feedback loops 2	32	69	429
P04397	HUMAN|HGNC=15979|UniProtKB=Q9H3D4,HUMAN|HGNC=11998|UniProtKB=P04637,HUMAN|HGNC=11389|UniProtKB=Q15831,HUMAN|HGNC=391|UniProtKB=P31749,HUMAN|HGNC=9299|UniProtKB=P67775,HUMAN|HGNC=3942|UniProtKB=P42345,HUMAN|HGNC=12003|UniProtKB=O15350,HUMAN|HGNC=9377|UniProtKB=P54646,HUMAN|HGNC=10011|UniProtKB=Q15382,HUMAN|HGNC=5461|UniProtKB=P78318,HUMAN|HGNC=10437|UniProtKB=Q9UBS0,HUMAN|HGNC=9378|UniProtKB=Q9Y47…	p53 pathway by glucose deprivation	13	27	193
P04396	HUMAN|HGNC=9208|UniProtKB=P16435,HUMAN|HGNC=10477|UniProtKB=P19793,HUMAN|HGNC=3638|UniProtKB=P10109,HUMAN|HGNC=12679|UniProtKB=P11473	Vitamin D metabolism and pathway	11	17	90
P04395	HUMAN|HGNC=9358|UniProtKB=P48147,HUMAN|HGNC=8596|UniProtKB=P19021,HUMAN|HGNC=23400|UniProtKB=Q9BY50	Vasopressin synthesis	11	22	134
P04394	HUMAN|HGNC=4412|UniProtKB=O14610,HUMAN|HGNC=12643|UniProtKB=P63027,HUMAN|HGNC=11131|UniProtKB=O00161,HUMAN|HGNC=9065|UniProtKB=P19174,HUMAN|HGNC=11438|UniProtKB=Q13277,HUMAN|HGNC=19664|UniProtKB=Q9UK08,HUMAN|HGNC=12298|UniProtKB=P20396,HUMAN|HGNC=4390|UniProtKB=P50148,HUMAN|HGNC=9401|UniProtKB=Q02156,HUMAN|HGNC=9061|UniProtKB=Q8N3E9	Thyrotropin-releasing hormone receptor signaling pathway	9	91	561
P04393	HUMAN|HGNC=8816|UniProtKB=O15530,HUMAN|HGNC=391|UniProtKB=P31749,HUMAN|HGNC=6872|UniProtKB=P53779,HUMAN|HGNC=6843|UniProtKB=P46734,HUMAN|HGNC=6877|UniProtKB=P27361,HUMAN|HGNC=667|UniProtKB=P61586,HUMAN|HGNC=6204|UniProtKB=P05412,HUMAN|HGNC=6846|UniProtKB=P52564,HUMAN|HGNC=8974|UniProtKB=Q8NEB9,HUMAN|HGNC=6856|UniProtKB=Q9Y6R4,HUMAN|HGNC=9839|UniProtKB=P11233,HUMAN|HGNC=9802|UniProtKB=P15153,HUMAN…	Ras Pathway	39	102	634
P04392	HUMAN|HGNC=15979|UniProtKB=Q9H3D4,HUMAN|HGNC=17440|UniProtKB=Q8NHY2,HUMAN|HGNC=11998|UniProtKB=P04637,HUMAN|HGNC=12003|UniProtKB=O15350	P53 pathway feedback loops 1	11	7	51
P04391	HUMAN|HGNC=4412|UniProtKB=O14610,HUMAN|HGNC=12643|UniProtKB=P63027,HUMAN|HGNC=11131|UniProtKB=O00161,HUMAN|HGNC=9065|UniProtKB=P19174,HUMAN|HGNC=11438|UniProtKB=Q13277,HUMAN|HGNC=19664|UniProtKB=Q9UK08,HUMAN|HGNC=4390|UniProtKB=P50148,HUMAN|HGNC=9401|UniProtKB=Q02156,HUMAN|HGNC=9061|UniProtKB=Q8N3E9	Oxytocin receptor mediated signaling pathway	6	85	538
P04386	HUMAN|HGNC=9391|UniProtKB=P13861,HUMAN|HGNC=4412|UniProtKB=O14610,HUMAN|HGNC=9380|UniProtKB=P17612,HUMAN|HGNC=19664|UniProtKB=Q9UK08,HUMAN|HGNC=9441|UniProtKB=P51817	Histamine H2 receptor mediated signaling pathway	4	38	252
P04385	HUMAN|HGNC=4412|UniProtKB=O14610,HUMAN|HGNC=9065|UniProtKB=P19174,HUMAN|HGNC=19664|UniProtKB=Q9UK08,HUMAN|HGNC=4390|UniProtKB=P50148,HUMAN|HGNC=9401|UniProtKB=Q02156,HUMAN|HGNC=9061|UniProtKB=Q8N3E9	Histamine H1 receptor mediated signaling pathway	5	65	414
P04384	HUMAN|HGNC=23|UniProtKB=P80404,HUMAN|HGNC=408|UniProtKB=P51649,HUMAN|HGNC=18966|UniProtKB=Q9Y600	Gamma-aminobutyric acid synthesis	3	8	65
P04380	HUMAN|HGNC=4412|UniProtKB=O14610,HUMAN|HGNC=12643|UniProtKB=P63027,HUMAN|HGNC=11131|UniProtKB=O00161,HUMAN|HGNC=11438|UniProtKB=Q13277,HUMAN|HGNC=19664|UniProtKB=Q9UK08,HUMAN|HGNC=4390|UniProtKB=P50148	Cortocotropin releasing factor receptor signaling pathway	9	46	323
P04379	HUMAN|HGNC=4412|UniProtKB=O14610,HUMAN|HGNC=12643|UniProtKB=P63027,HUMAN|HGNC=11131|UniProtKB=O00161,HUMAN|HGNC=11438|UniProtKB=Q13277,HUMAN|HGNC=19664|UniProtKB=Q9UK08	Beta3 adrenergic receptor signaling pathway	4	40	277
P04378	HUMAN|HGNC=9391|UniProtKB=P13861,HUMAN|HGNC=4412|UniProtKB=O14610,HUMAN|HGNC=9380|UniProtKB=P17612,HUMAN|HGNC=12643|UniProtKB=P63027,HUMAN|HGNC=11131|UniProtKB=O00161,HUMAN|HGNC=11438|UniProtKB=Q13277,HUMAN|HGNC=19664|UniProtKB=Q9UK08,HUMAN|HGNC=9441|UniProtKB=P51817	Beta2 adrenergic receptor signaling pathway	7	66	417
P04377	HUMAN|HGNC=9391|UniProtKB=P13861,HUMAN|HGNC=4412|UniProtKB=O14610,HUMAN|HGNC=9380|UniProtKB=P17612,HUMAN|HGNC=12643|UniProtKB=P63027,HUMAN|HGNC=11131|UniProtKB=O00161,HUMAN|HGNC=11438|UniProtKB=Q13277,HUMAN|HGNC=19664|UniProtKB=Q9UK08,HUMAN|HGNC=9441|UniProtKB=P51817	Beta1 adrenergic receptor signaling pathway	7	66	416
P04376	HUMAN|HGNC=4412|UniProtKB=O14610,HUMAN|HGNC=12643|UniProtKB=P63027,HUMAN|HGNC=11131|UniProtKB=O00161,HUMAN|HGNC=11438|UniProtKB=Q13277,HUMAN|HGNC=19664|UniProtKB=Q9UK08	5HT4 type receptor mediated signaling pathway	7	45	309
P04375	HUMAN|HGNC=12643|UniProtKB=P63027,HUMAN|HGNC=11131|UniProtKB=O00161,HUMAN|HGNC=11438|UniProtKB=Q13277	5HT3 type receptor mediated signaling pathway	5	22	129
P04374	HUMAN|HGNC=4412|UniProtKB=O14610,HUMAN|HGNC=12643|UniProtKB=P63027,HUMAN|HGNC=11131|UniProtKB=O00161,HUMAN|HGNC=9065|UniProtKB=P19174,HUMAN|HGNC=5293|UniProtKB=P28223,HUMAN|HGNC=4403|UniProtKB=P61952,HUMAN|HGNC=11438|UniProtKB=Q13277,HUMAN|HGNC=19664|UniProtKB=Q9UK08,HUMAN|HGNC=4390|UniProtKB=P50148,HUMAN|HGNC=9401|UniProtKB=Q02156,HUMAN|HGNC=9061|UniProtKB=Q8N3E9	5HT2 type receptor mediated signaling pathway	9	97	594
P04373	HUMAN|HGNC=9391|UniProtKB=P13861,HUMAN|HGNC=4412|UniProtKB=O14610,HUMAN|HGNC=9380|UniProtKB=P17612,HUMAN|HGNC=12643|UniProtKB=P63027,HUMAN|HGNC=11131|UniProtKB=O00161,HUMAN|HGNC=4389|UniProtKB=P09471,HUMAN|HGNC=4403|UniProtKB=P61952,HUMAN|HGNC=11438|UniProtKB=Q13277,HUMAN|HGNC=19664|UniProtKB=Q9UK08,HUMAN|HGNC=9441|UniProtKB=P51817,HUMAN|HGNC=5287|UniProtKB=P28222	5HT1 type receptor mediated signaling pathway	8	62	414
P04372	HUMAN|HGNC=404|UniProtKB=P05091,HUMAN|HGNC=402|UniProtKB=P00352,HUMAN|HGNC=408|UniProtKB=P51649,HUMAN|HGNC=15471|UniProtKB=Q9H2A2,HUMAN|HGNC=411|UniProtKB=P48448,HUMAN|HGNC=407|UniProtKB=P30837,HUMAN|HGNC=409|UniProtKB=P47895,HUMAN|HGNC=412|UniProtKB=P49189	5-Hydroxytryptamine degredation	2	57	230
P02788	HUMAN|HGNC=23333|UniProtKB=Q9NRG1,HUMAN|HGNC=7892|UniProtKB=P00491,HUMAN|HGNC=5157|UniProtKB=P00492	Xanthine and guanine salvage pathway	7	7	64
P02787	HUMAN|HGNC=8819|UniProtKB=O00764,HUMAN|HGNC=19129|UniProtKB=Q9Y617	Vitamin B6 metabolism	19	11	56
P02785	HUMAN|HGNC=6041|UniProtKB=A1L0T0,HUMAN|HGNC=976|UniProtKB=P54687	Valine biosynthesis	4	29	114
P02782	HUMAN|HGNC=6619|UniProtKB=P11150,HUMAN|HGNC=6621|UniProtKB=Q05469	Triacylglycerol metabolism	13	2	10
P02778	HUMAN|HGNC=8604|UniProtKB=O95340,HUMAN|HGNC=8603|UniProtKB=O43252	Sulfate assimilation	4	10	54
P02777	HUMAN|HGNC=6937|UniProtKB=Q9HCC0,HUMAN|HGNC=7526|UniProtKB=P22033	Succinate to proprionate conversion	3	11	57
P02776	HUMAN|HGNC=10852|UniProtKB=P34897,HUMAN|HGNC=9577|UniProtKB=P78330,HUMAN|HGNC=10850|UniProtKB=P34896,HUMAN|HGNC=19129|UniProtKB=Q9Y617	Serine glycine biosynthesis	4	17	129
P02775	HUMAN|HGNC=12576|UniProtKB=Q16831,HUMAN|HGNC=7852|UniProtKB=O00746,HUMAN|HGNC=1712|UniProtKB=P32320,HUMAN|HGNC=18170|UniProtKB=P30085	Salvage pyrimidine ribonucleotides	8	29	140
P02774	HUMAN|HGNC=1712|UniProtKB=P32320	Salvage pyrimidine deoxyribonucleotides	5	10	70
P02773	HUMAN|HGNC=6904|UniProtKB=P31153	S adenosyl methionine biosynthesis	2	11	68
P02772	HUMAN|HGNC=8636|UniProtKB=P11498,HUMAN|HGNC=8807|UniProtKB=P29803,HUMAN|HGNC=8724|UniProtKB=P35558,HUMAN|HGNC=115|UniProtKB=P53396	Pyruvate metabolism	10	35	121
P02771	HUMAN|HGNC=23|UniProtKB=P80404,HUMAN|HGNC=1712|UniProtKB=P32320,HUMAN|HGNC=3013|UniProtKB=Q14117	Pyrimidine Metabolism	8	17	88
P02770	HUMAN|HGNC=8819|UniProtKB=O00764	Pyridoxal phosphate salvage pathway	4	4	36
P02769	HUMAN|HGNC=7892|UniProtKB=P00491	Purine metabolism	5	9	38
P02768	HUMAN|HGNC=30262|UniProtKB=Q96C36	Proline biosynthesis	3	9	72
P02762	HUMAN|HGNC=4458|UniProtKB=P06744,HUMAN|HGNC=4923|UniProtKB=P52789,HUMAN|HGNC=11834|UniProtKB=P29401,HUMAN|HGNC=11559|UniProtKB=P37837,HUMAN|HGNC=10297|UniProtKB=P49247,HUMAN|HGNC=8891|UniProtKB=P52209	Pentose phosphate pathway	13	18	57
P02759	HUMAN|HGNC=19129|UniProtKB=Q9Y617	PLP biosynthesis	7	9	59
P02758	HUMAN|HGNC=16432|UniProtKB=O14977,HUMAN|HGNC=8109|UniProtKB=P11926	Ornithine degradation	3	7	53
P02757	HUMAN|HGNC=4242|UniProtKB=O94808	O-antigen biosynthesis	9	21	130
P02756	HUMAN|HGNC=4242|UniProtKB=O94808	N-acetylglucosamine metabolism	9	17	119
P02755	HUMAN|HGNC=6937|UniProtKB=Q9HCC0,HUMAN|HGNC=7526|UniProtKB=P22033	Methylmalonyl pathway	3	11	64
P02754	HUMAN|HGNC=117|UniProtKB=P21399,HUMAN|HGNC=14479|UniProtKB=Q7Z2W9	Methylcitrate cycle	5	11	41
P02753	HUMAN|HGNC=2501|UniProtKB=P32929	Methionine biosynthesis	4	14	48
P02749	HUMAN|HGNC=976|UniProtKB=P54687	Leucine biosynthesis	4	25	106
P02748	HUMAN|HGNC=6041|UniProtKB=A1L0T0,HUMAN|HGNC=976|UniProtKB=P54687	Isoleucine biosynthesis	5	33	141
P02746	HUMAN|HGNC=9751|UniProtKB=P47897,HUMAN|HGNC=4982|UniProtKB=P08397,HUMAN|HGNC=2321|UniProtKB=P36551,HUMAN|HGNC=12592|UniProtKB=P10746,HUMAN|HGNC=395|UniProtKB=P13716	Heme biosynthesis	15	36	284
P02745	HUMAN|HGNC=4341|UniProtKB=P15104	Glutamine glutamate conversion	3	24	149
P02744	HUMAN|HGNC=418|UniProtKB=P09972,HUMAN|HGNC=417|UniProtKB=P05062,HUMAN|HGNC=414|UniProtKB=P04075,HUMAN|HGNC=4923|UniProtKB=P52789	Fructose galactose metabolism	8	21	93
P02743	HUMAN|HGNC=12441|UniProtKB=P04818,HUMAN|HGNC=21055|UniProtKB=Q6UB35,HUMAN|HGNC=7434|UniProtKB=P13995	Formyltetrahydroformate biosynthesis	7	26	129
P02742	HUMAN|HGNC=12441|UniProtKB=P04818	Folate biosynthesis	11	22	145
P02741	HUMAN|HGNC=24671|UniProtKB=Q8NFF5	Flavin biosynthesis	9	20	105
P02740	HUMAN|HGNC=7852|UniProtKB=O00746,HUMAN|HGNC=31358|UniProtKB=O60361,HUMAN|HGNC=18170|UniProtKB=P30085,HUMAN|HGNC=1424|UniProtKB=P27708	De novo pyrmidine ribonucleotides biosythesis	10	33	267
P02739	HUMAN|HGNC=7852|UniProtKB=O00746,HUMAN|HGNC=12441|UniProtKB=P04818,HUMAN|HGNC=31358|UniProtKB=O60361	De novo pyrimidine deoxyribonucleotide biosynthesis	10	31	251
P02738	HUMAN|HGNC=7852|UniProtKB=O00746,HUMAN|HGNC=6053|UniProtKB=P12268,HUMAN|HGNC=9238|UniProtKB=Q06203,HUMAN|HGNC=31358|UniProtKB=O60361,HUMAN|HGNC=17376|UniProtKB=Q9UIJ7,HUMAN|HGNC=4163|UniProtKB=P22102,HUMAN|HGNC=18170|UniProtKB=P30085,HUMAN|HGNC=794|UniProtKB=P31939,HUMAN|HGNC=291|UniProtKB=P30566,HUMAN|HGNC=20461|UniProtKB=Q9Y5B8	De novo purine biosynthesis	23	71	580
P02730	HUMAN|HGNC=4432|UniProtKB=P17174	Asparagine and aspartate biosynthesis	3	25	100
P02728	HUMAN|HGNC=758|UniProtKB=P00966,HUMAN|HGNC=746|UniProtKB=P04424,HUMAN|HGNC=1424|UniProtKB=P27708	Arginine biosynthesis	9	21	174
P02726	HUMAN|HGNC=23|UniProtKB=P80404,HUMAN|HGNC=408|UniProtKB=P51649	Aminobutyrate degradation	2	8	42
P02724	HUMAN|HGNC=976|UniProtKB=P54687	Alanine biosynthesis	3	10	38
P02723	HUMAN|HGNC=23333|UniProtKB=Q9NRG1,HUMAN|HGNC=7892|UniProtKB=P00491,HUMAN|HGNC=5157|UniProtKB=P00492	Adenine and hypoxanthine salvage pathway	10	20	122
P02721	HUMAN|HGNC=833|UniProtKB=P36542,HUMAN|HGNC=830|UniProtKB=P06576	ATP synthesis	12	16	69
P00060	HUMAN|HGNC=15937|UniProtKB=O00762,HUMAN|HGNC=19678|UniProtKB=Q9Y5K5,HUMAN|HGNC=9561|UniProtKB=P55036,HUMAN|HGNC=30660|UniProtKB=Q9UBE0,HUMAN|HGNC=9549|UniProtKB=P17980,HUMAN|HGNC=9552|UniProtKB=P62195,HUMAN|HGNC=12475|UniProtKB=P62837,HUMAN|HGNC=12479|UniProtKB=Q969T4,HUMAN|HGNC=12490|UniProtKB=O14933,HUMAN|HGNC=12474|UniProtKB=P51668,HUMAN|HGNC=12495|UniProtKB=Q15819,HUMAN|HGNC=12492|UniProtKB=P…	Ubiquitin proteasome pathway	6	103	584
P00059	HUMAN|HGNC=15979|UniProtKB=Q9H3D4,HUMAN|HGNC=11785|UniProtKB=P07996,HUMAN|HGNC=1592|UniProtKB=P51959,HUMAN|HGNC=1787|UniProtKB=P42771,HUMAN|HGNC=6210|UniProtKB=P27701,HUMAN|HGNC=1579|UniProtKB=P14635,HUMAN|HGNC=11906|UniProtKB=O14798,HUMAN|HGNC=8816|UniProtKB=O15530,HUMAN|HGNC=3373|UniProtKB=Q09472,HUMAN|HGNC=11920|UniProtKB=P25445,HUMAN|HGNC=9299|UniProtKB=P67775,HUMAN|HGNC=3115|UniProtKB=O00716…	p53 pathway	70	103	620
P00058	HUMAN|HGNC=17349|UniProtKB=O43172,HUMAN|HGNC=11151|UniProtKB=P09012,HUMAN|HGNC=17348|UniProtKB=O43395	mRNA splicing	10	13	45
P00057	HUMAN|HGNC=1582|UniProtKB=P24385,HUMAN|HGNC=903|UniProtKB=O15169,HUMAN|HGNC=10776|UniProtKB=Q8N474,HUMAN|HGNC=4041|UniProtKB=Q9NPG1,HUMAN|HGNC=130|UniProtKB=P62736,HUMAN|HGNC=12774|UniProtKB=P04628,HUMAN|HGNC=10777|UniProtKB=Q96HF1,HUMAN|HGNC=7174|UniProtKB=P09237,HUMAN|HGNC=4383|UniProtKB=P30679,HUMAN|HGNC=2455|UniProtKB=P78368,HUMAN|HGNC=129|UniProtKB=P68133,HUMAN|HGNC=24036|UniProtKB=O95996,HU…	Wnt signaling pathway	49	445	2382
P00056	HUMAN|HGNC=29869|UniProtKB=P98077,HUMAN|HGNC=391|UniProtKB=P31749,HUMAN|HGNC=6877|UniProtKB=P27361,HUMAN|HGNC=5247|UniProtKB=Q16082,HUMAN|HGNC=9035|UniProtKB=P47712,HUMAN|HGNC=8974|UniProtKB=Q8NEB9,HUMAN|HGNC=8972|UniProtKB=O00750,HUMAN|HGNC=9802|UniProtKB=P15153,HUMAN|HGNC=9611|UniProtKB=Q05397,HUMAN|HGNC=3488|UniProtKB=P14921,HUMAN|HGNC=17293|UniProtKB=Q9BZL6,HUMAN|HGNC=9065|UniProtKB=P19174,HU…	VEGF signaling pathway	25	96	502
P00055	HUMAN|HGNC=9391|UniProtKB=P13861,HUMAN|HGNC=11551|UniProtKB=Q92994,HUMAN|HGNC=2347|UniProtKB=O43889,HUMAN|HGNC=11589|UniProtKB=P62380,HUMAN|HGNC=4648|UniProtKB=Q00403,HUMAN|HGNC=3373|UniProtKB=Q09472,HUMAN|HGNC=2498|UniProtKB=Q9Y5B0,HUMAN|HGNC=9388|UniProtKB=P10644,HUMAN|HGNC=4655|UniProtKB=P32780,HUMAN|HGNC=9390|UniProtKB=P31321,HUMAN|HGNC=17298|UniProtKB=Q9HAW0,HUMAN|HGNC=4646|UniProtKB=P52655,…	Transcription regulation by bZIP transcription factor	25	83	522
P00054	HUMAN|HGNC=9605|UniProtKB=P35354,HUMAN|HGNC=11584|UniProtKB=Q9UHD2,HUMAN|HGNC=11848|UniProtKB=O60603,HUMAN|HGNC=7797|UniProtKB=P25963,HUMAN|HGNC=6872|UniProtKB=P53779,HUMAN|HGNC=6860|UniProtKB=P41279,HUMAN|HGNC=6843|UniProtKB=P46734,HUMAN|HGNC=6877|UniProtKB=P27361,HUMAN|HGNC=17156|UniProtKB=Q9Y6Y9,HUMAN|HGNC=6112|UniProtKB=P51617,HUMAN|HGNC=6204|UniProtKB=P05412,HUMAN|HGNC=7799|UniProtKB=O00221,…	Toll receptor signaling pathway	46	69	315
P00053	HUMAN|HGNC=12858|UniProtKB=P43403,HUMAN|HGNC=6872|UniProtKB=P53779,HUMAN|HGNC=6877|UniProtKB=P27361,HUMAN|HGNC=12657|UniProtKB=P15498,HUMAN|HGNC=7665|UniProtKB=O43639,HUMAN|HGNC=9065|UniProtKB=P19174,HUMAN|HGNC=6848|UniProtKB=Q13233,HUMAN|HGNC=8591|UniProtKB=Q13177,HUMAN|HGNC=12731|UniProtKB=P42768,HUMAN|HGNC=1674|UniProtKB=P07766,HUMAN|HGNC=646|UniProtKB=P10398,HUMAN|HGNC=7664|UniProtKB=P16333,H…	T cell activation	45	101	579
P00052	HUMAN|HGNC=10897|UniProtKB=P12757,HUMAN|HGNC=11769|UniProtKB=P10600,HUMAN|HGNC=6880|UniProtKB=Q13164,HUMAN|HGNC=4215|UniProtKB=P55107,HUMAN|HGNC=465|UniProtKB=Q16671,HUMAN|HGNC=3373|UniProtKB=Q09472,HUMAN|HGNC=6872|UniProtKB=P53779,HUMAN|HGNC=30142|UniProtKB=Q99988,HUMAN|HGNC=10447|UniProtKB=P10301,HUMAN|HGNC=18714|UniProtKB=Q9NPI6,HUMAN|HGNC=6877|UniProtKB=P27361,HUMAN|HGNC=6775|UniProtKB=O95405…	TGF-beta signaling pathway	20	164	856
P00051	HUMAN|HGNC=6970|UniProtKB=P40925,HUMAN|HGNC=3700|UniProtKB=P07954,HUMAN|HGNC=8807|UniProtKB=P29803	TCA cycle	10	23	80
P00050	HUMAN|HGNC=9051|UniProtKB=P00750,HUMAN|HGNC=8583|UniProtKB=P05121,HUMAN|HGNC=7176|UniProtKB=P14780	Plasminogen activating cascade	22	19	82
P00049	HUMAN|HGNC=2879|UniProtKB=Q8WYJ6,HUMAN|HGNC=9533|UniProtKB=P25789,HUMAN|HGNC=6880|UniProtKB=Q13164,HUMAN|HGNC=6872|UniProtKB=P53779,HUMAN|HGNC=12841|UniProtKB=P07947,HUMAN|HGNC=11283|UniProtKB=P12931,HUMAN|HGNC=12490|UniProtKB=O14933,HUMAN|HGNC=6877|UniProtKB=P27361,HUMAN|HGNC=6735|UniProtKB=P07948,HUMAN|HGNC=4494|UniProtKB=O15354,HUMAN|HGNC=3098|UniProtKB=O14656,HUMAN|HGNC=4037|UniProtKB=P06241,…	Parkinson disease	37	180	1171
P00048	HUMAN|HGNC=1582|UniProtKB=P24385,HUMAN|HGNC=4412|UniProtKB=O14610,HUMAN|HGNC=8816|UniProtKB=O15530,HUMAN|HGNC=391|UniProtKB=P31749,HUMAN|HGNC=10437|UniProtKB=Q9UBS0,HUMAN|HGNC=5469|UniProtKB=P08833,HUMAN|HGNC=4390|UniProtKB=P50148,HUMAN|HGNC=7139|UniProtKB=P98177,HUMAN|HGNC=4566|UniProtKB=P62993	PI3 kinase pathway	35	80	445
P00047	HUMAN|HGNC=11366|UniProtKB=P42229,HUMAN|HGNC=8800|UniProtKB=P01127,HUMAN|HGNC=6880|UniProtKB=Q13164,HUMAN|HGNC=9871|UniProtKB=P20936,HUMAN|HGNC=5959|UniProtKB=O95163,HUMAN|HGNC=29869|UniProtKB=P98077,HUMAN|HGNC=8816|UniProtKB=O15530,HUMAN|HGNC=6872|UniProtKB=P53779,HUMAN|HGNC=26099|UniProtKB=A1A4S6,HUMAN|HGNC=29163|UniProtKB=Q9Y2I6,HUMAN|HGNC=6877|UniProtKB=P27361,HUMAN|HGNC=7111|UniProtKB=Q9HBH9…	PDGF signaling pathway	36	200	1058
P00046	HUMAN|HGNC=12435|UniProtKB=P10599,HUMAN|HGNC=6872|UniProtKB=P53779,HUMAN|HGNC=6843|UniProtKB=P46734,HUMAN|HGNC=9035|UniProtKB=P47712,HUMAN|HGNC=7111|UniProtKB=Q9HBH9,HUMAN|HGNC=6204|UniProtKB=P05412,HUMAN|HGNC=6846|UniProtKB=P52564,HUMAN|HGNC=6856|UniProtKB=Q9Y6R4,HUMAN|HGNC=7110|UniProtKB=Q9BUB5,HUMAN|HGNC=2726|UniProtKB=P35638,HUMAN|HGNC=12436|UniProtKB=O43396,HUMAN|HGNC=24615|UniProtKB=O00418,…	Oxidative stress response	20	82	371
P00045	HUMAN|HGNC=9508|UniProtKB=P49768,HUMAN|HGNC=7881|UniProtKB=P46531,HUMAN|HGNC=20421|UniProtKB=Q8N448,HUMAN|HGNC=29509|UniProtKB=Q96BI3,HUMAN|HGNC=2907|UniProtKB=P80370,HUMAN|HGNC=188|UniProtKB=O14672,HUMAN|HGNC=9509|UniProtKB=P49810,HUMAN|HGNC=24217|UniProtKB=Q86X95,HUMAN|HGNC=7882|UniProtKB=Q04721,HUMAN|HGNC=6189|UniProtKB=Q9Y219,HUMAN|HGNC=19764|UniProtKB=Q5TA89,HUMAN|HGNC=6657|UniProtKB=Q8TBB1,…	Notch signaling pathway	23	52	279
P00044	HUMAN|HGNC=14079|UniProtKB=Q9UGM1,HUMAN|HGNC=167|UniProtKB=P61163,HUMAN|HGNC=11131|UniProtKB=O00161,HUMAN|HGNC=26234|UniProtKB=Q96H55,HUMAN|HGNC=143|UniProtKB=P68032,HUMAN|HGNC=11439|UniProtKB=Q12846,HUMAN|HGNC=7595|UniProtKB=Q9UBC5,HUMAN|HGNC=130|UniProtKB=P62736,HUMAN|HGNC=12643|UniProtKB=P63027,HUMAN|HGNC=11055|UniProtKB=P48029,HUMAN|HGNC=13880|UniProtKB=B0I1T2,HUMAN|HGNC=11438|UniProtKB=Q1327…	Nicotinic acetylcholine receptor signaling pathway	13	227	992
P00043	HUMAN|HGNC=9391|UniProtKB=P13861,HUMAN|HGNC=4412|UniProtKB=O14610,HUMAN|HGNC=9380|UniProtKB=P17612,HUMAN|HGNC=11131|UniProtKB=O00161,HUMAN|HGNC=4403|UniProtKB=P61952,HUMAN|HGNC=19664|UniProtKB=Q9UK08,HUMAN|HGNC=9388|UniProtKB=P10644,HUMAN|HGNC=6266|UniProtKB=P48544,HUMAN|HGNC=9441|UniProtKB=P51817,HUMAN|HGNC=9390|UniProtKB=P31321,HUMAN|HGNC=11439|UniProtKB=Q12846,HUMAN|HGNC=12643|UniProtKB=P63027…	Muscarinic acetylcholine receptor 2 and 4 signaling pathway	11	110	550
P00042	HUMAN|HGNC=4412|UniProtKB=O14610,HUMAN|HGNC=12643|UniProtKB=P63027,HUMAN|HGNC=11131|UniProtKB=O00161,HUMAN|HGNC=4403|UniProtKB=P61952,HUMAN|HGNC=19664|UniProtKB=Q9UK08,HUMAN|HGNC=108|UniProtKB=P22303,HUMAN|HGNC=4390|UniProtKB=P50148,HUMAN|HGNC=9401|UniProtKB=Q02156	Muscarinic acetylcholine receptor 1 and 3 signaling pathway	12	93	529
P00041	HUMAN|HGNC=9380|UniProtKB=P17612,HUMAN|HGNC=4383|UniProtKB=P30679,HUMAN|HGNC=9388|UniProtKB=P10644,HUMAN|HGNC=4390|UniProtKB=P50148,HUMAN|HGNC=9441|UniProtKB=P51817,HUMAN|HGNC=9390|UniProtKB=P31321	Metabotropic glutamate receptor group I pathway	10	37	193
P00040	HUMAN|HGNC=9391|UniProtKB=P13861,HUMAN|HGNC=4412|UniProtKB=O14610,HUMAN|HGNC=9380|UniProtKB=P17612,HUMAN|HGNC=12643|UniProtKB=P63027,HUMAN|HGNC=11131|UniProtKB=O00161,HUMAN|HGNC=4389|UniProtKB=P09471,HUMAN|HGNC=4403|UniProtKB=P61952,HUMAN|HGNC=19664|UniProtKB=Q9UK08,HUMAN|HGNC=9388|UniProtKB=P10644,HUMAN|HGNC=9441|UniProtKB=P51817,HUMAN|HGNC=9390|UniProtKB=P31321	Metabotropic glutamate receptor group II pathway	7	73	417
P00039	HUMAN|HGNC=9391|UniProtKB=P13861,HUMAN|HGNC=4412|UniProtKB=O14610,HUMAN|HGNC=9380|UniProtKB=P17612,HUMAN|HGNC=12643|UniProtKB=P63027,HUMAN|HGNC=11131|UniProtKB=O00161,HUMAN|HGNC=19664|UniProtKB=Q9UK08,HUMAN|HGNC=9388|UniProtKB=P10644,HUMAN|HGNC=9441|UniProtKB=P51817,HUMAN|HGNC=9390|UniProtKB=P31321	Metabotropic glutamate receptor group III pathway	12	101	588
P00038	HUMAN|HGNC=11366|UniProtKB=P42229,HUMAN|HGNC=17311|UniProtKB=O75928,HUMAN|HGNC=17002|UniProtKB=Q8N2W9,HUMAN|HGNC=19383|UniProtKB=O15524,HUMAN|HGNC=2752|UniProtKB=O75925,HUMAN|HGNC=11363|UniProtKB=P52630	JAK/STAT signaling pathway	8	17	118
P00037	HUMAN|HGNC=12643|UniProtKB=P63027,HUMAN|HGNC=11131|UniProtKB=O00161,HUMAN|HGNC=1460|UniProtKB=Q9UQM7	Ionotropic glutamate receptor pathway	29	74	394
P00036	HUMAN|HGNC=11366|UniProtKB=P42229,HUMAN|HGNC=6880|UniProtKB=Q13164,HUMAN|HGNC=9871|UniProtKB=P20936,HUMAN|HGNC=8816|UniProtKB=O15530,HUMAN|HGNC=6009|UniProtKB=P14784,HUMAN|HGNC=6877|UniProtKB=P27361,HUMAN|HGNC=7111|UniProtKB=Q9HBH9,HUMAN|HGNC=6856|UniProtKB=Q9Y6R4,HUMAN|HGNC=6025|UniProtKB=P10145,HUMAN|HGNC=6016|UniProtKB=P05113,HUMAN|HGNC=646|UniProtKB=P10398,HUMAN|HGNC=1785|UniProtKB=P46527,HUM…	Interleukin signaling pathway	36	98	569
P00035	HUMAN|HGNC=9658|UniProtKB=P29350,HUMAN|HGNC=17311|UniProtKB=O75928,HUMAN|HGNC=6880|UniProtKB=Q13164,HUMAN|HGNC=29846|UniProtKB=O14512,HUMAN|HGNC=17002|UniProtKB=Q8N2W9,HUMAN|HGNC=1984|UniProtKB=Q9NSE2,HUMAN|HGNC=16833|UniProtKB=O14544,HUMAN|HGNC=19392|UniProtKB=Q8WXH5,HUMAN|HGNC=19391|UniProtKB=O14543,HUMAN|HGNC=6872|UniProtKB=P53779,HUMAN|HGNC=2752|UniProtKB=O75925,HUMAN|HGNC=6877|UniProtKB=P273…	Interferon-gamma signaling pathway	10	54	269
P00034	HUMAN|HGNC=6139|UniProtKB=P26006,HUMAN|HGNC=4568|UniProtKB=Q13905,HUMAN|HGNC=671|UniProtKB=P61587,HUMAN|HGNC=76|UniProtKB=P00519,HUMAN|HGNC=6141|UniProtKB=P08648,HUMAN|HGNC=6487|UniProtKB=P55268,HUMAN|HGNC=6872|UniProtKB=P53779,HUMAN|HGNC=26099|UniProtKB=A1A4S6,HUMAN|HGNC=11283|UniProtKB=P12931,HUMAN|HGNC=6843|UniProtKB=P46734,HUMAN|HGNC=6877|UniProtKB=P27361,HUMAN|HGNC=667|UniProtKB=P61586,HUMAN…	Integrin signalling pathway	46	248	1340
P00033	HUMAN|HGNC=8974|UniProtKB=Q8NEB9,HUMAN|HGNC=6128|UniProtKB=O14654,HUMAN|HGNC=8972|UniProtKB=O00750,HUMAN|HGNC=6126|UniProtKB=Q9Y4H2,HUMAN|HGNC=8816|UniProtKB=O15530,HUMAN|HGNC=391|UniProtKB=P31749,HUMAN|HGNC=5464|UniProtKB=P05019	Insulin/IGF pathway-protein kinase B signaling cascade	18	56	296
P00032	HUMAN|HGNC=6128|UniProtKB=O14654,HUMAN|HGNC=6880|UniProtKB=Q13164,HUMAN|HGNC=9871|UniProtKB=P20936,HUMAN|HGNC=6126|UniProtKB=Q9Y4H2,HUMAN|HGNC=10437|UniProtKB=Q9UBS0,HUMAN|HGNC=6844|UniProtKB=P45985,HUMAN|HGNC=6843|UniProtKB=P46734,HUMAN|HGNC=6877|UniProtKB=P27361,HUMAN|HGNC=5464|UniProtKB=P05019,HUMAN|HGNC=4566|UniProtKB=P62993	Insulin/IGF pathway-mitogen activated protein kinase kinase/MAP kinase cascade	12	68	296
P00031	HUMAN|HGNC=6880|UniProtKB=Q13164,HUMAN|HGNC=16833|UniProtKB=O14544,HUMAN|HGNC=8816|UniProtKB=O15530,HUMAN|HGNC=2561|UniProtKB=P61073,HUMAN|HGNC=433|UniProtKB=P16050,HUMAN|HGNC=667|UniProtKB=P61586,HUMAN|HGNC=12657|UniProtKB=P15498,HUMAN|HGNC=7799|UniProtKB=O00221,HUMAN|HGNC=706|UniProtKB=O15145,HUMAN|HGNC=130|UniProtKB=P62736,HUMAN|HGNC=6025|UniProtKB=P10145,HUMAN|HGNC=8861|UniProtKB=P02776,HUMAN…	Inflammation mediated by chemokine and cytokine signaling pathway	58	337	1715
P00030	HUMAN|HGNC=8974|UniProtKB=Q8NEB9,HUMAN|HGNC=2348|UniProtKB=Q92793,HUMAN|HGNC=14660|UniProtKB=Q96KS0,HUMAN|HGNC=8972|UniProtKB=O00750,HUMAN|HGNC=700|UniProtKB=P27540,HUMAN|HGNC=30666|UniProtKB=Q6RSH7,HUMAN|HGNC=12436|UniProtKB=O43396,HUMAN|HGNC=14661|UniProtKB=Q9H6Z9,HUMAN|HGNC=391|UniProtKB=P31749,HUMAN|HGNC=12435|UniProtKB=P10599,HUMAN|HGNC=17772|UniProtKB=Q99757,HUMAN|HGNC=3942|UniProtKB=P42345	Hypoxia response via HIF activation	14	43	211
P00029	HUMAN|HGNC=7007|UniProtKB=P61006,HUMAN|HGNC=2963|UniProtKB=O14576,HUMAN|HGNC=15979|UniProtKB=Q9H3D4,HUMAN|HGNC=20778|UniProtKB=P07437,HUMAN|HGNC=3373|UniProtKB=Q09472,HUMAN|HGNC=18745|UniProtKB=Q9Y6G9,HUMAN|HGNC=17160|UniProtKB=P53365,HUMAN|HGNC=17367|UniProtKB=Q9NWB7,HUMAN|HGNC=1504|UniProtKB=P42574,HUMAN|HGNC=17260|UniProtKB=O95379,HUMAN|HGNC=130|UniProtKB=P62736,HUMAN|HGNC=2348|UniProtKB=Q9279…	Huntington disease	60	274	1586
P00028	HUMAN|HGNC=2151|UniProtKB=Q14028,HUMAN|HGNC=4412|UniProtKB=O14610,HUMAN|HGNC=10012|UniProtKB=P08100,HUMAN|HGNC=10013|UniProtKB=Q15835,HUMAN|HGNC=9380|UniProtKB=P17612,HUMAN|HGNC=1452|UniProtKB=P27482,HUMAN|HGNC=19664|UniProtKB=Q9UK08,HUMAN|HGNC=10521|UniProtKB=P10523,HUMAN|HGNC=9441|UniProtKB=P51817	Heterotrimeric G-protein signaling pathway-rod outer segment phototransduction	15	54	335
P00027	HUMAN|HGNC=4412|UniProtKB=O14610,HUMAN|HGNC=9995|UniProtKB=O14921,HUMAN|HGNC=13735|UniProtKB=P49795,HUMAN|HGNC=9998|UniProtKB=P41220,HUMAN|HGNC=19664|UniProtKB=Q9UK08,HUMAN|HGNC=29501|UniProtKB=P81274,HUMAN|HGNC=4390|UniProtKB=P50148,HUMAN|HGNC=6266|UniProtKB=P48544,HUMAN|HGNC=667|UniProtKB=P61586,HUMAN|HGNC=9997|UniProtKB=O15492,HUMAN|HGNC=2091|UniProtKB=P09497,HUMAN|HGNC=8155|UniProtKB=P41146,H…	Heterotrimeric G-protein signaling pathway-Gq alpha and Go alpha mediated pathway	21	152	877
P00026	HUMAN|HGNC=9391|UniProtKB=P13861,HUMAN|HGNC=9380|UniProtKB=P17612,HUMAN|HGNC=2347|UniProtKB=O43889,HUMAN|HGNC=3373|UniProtKB=Q09472,HUMAN|HGNC=19664|UniProtKB=Q9UK08,HUMAN|HGNC=29501|UniProtKB=P81274,HUMAN|HGNC=6266|UniProtKB=P48544,HUMAN|HGNC=2348|UniProtKB=Q92793,HUMAN|HGNC=10013|UniProtKB=Q15835,HUMAN|HGNC=2091|UniProtKB=P09497,HUMAN|HGNC=8155|UniProtKB=P41146,HUMAN|HGNC=5293|UniProtKB=P28223,…	Heterotrimeric G-protein signaling pathway-Gi alpha and Gs alpha mediated pathway	27	214	1161
P00025	HUMAN|HGNC=4317|UniProtKB=P08151,HUMAN|HGNC=9391|UniProtKB=P13861,HUMAN|HGNC=13607|UniProtKB=Q9UKB1,HUMAN|HGNC=20289|UniProtKB=Q8N752,HUMAN|HGNC=2348|UniProtKB=Q92793,HUMAN|HGNC=16466|UniProtKB=Q9UMX1,HUMAN|HGNC=9388|UniProtKB=P10644,HUMAN|HGNC=9390|UniProtKB=P31321	Hedgehog signaling pathway	20	30	174
P00024	HUMAN|HGNC=418|UniProtKB=P09972,HUMAN|HGNC=8876|UniProtKB=P17858,HUMAN|HGNC=4458|UniProtKB=P06744,HUMAN|HGNC=417|UniProtKB=P05062,HUMAN|HGNC=414|UniProtKB=P04075,HUMAN|HGNC=4923|UniProtKB=P52789,HUMAN|HGNC=12009|UniProtKB=P60174,HUMAN|HGNC=8888|UniProtKB=P18669,HUMAN|HGNC=3353|UniProtKB=P09104,HUMAN|HGNC=8896|UniProtKB=P00558	Glycolysis	10	43	145
P00023	HUMAN|HGNC=11551|UniProtKB=Q92994,HUMAN|HGNC=11589|UniProtKB=P62380,HUMAN|HGNC=4648|UniProtKB=Q00403,HUMAN|HGNC=2498|UniProtKB=Q9Y5B0,HUMAN|HGNC=4655|UniProtKB=P32780,HUMAN|HGNC=17298|UniProtKB=Q9HAW0,HUMAN|HGNC=4646|UniProtKB=P52655,HUMAN|HGNC=17928|UniProtKB=Q9P2W1,HUMAN|HGNC=11541|UniProtKB=Q15545,HUMAN|HGNC=11537|UniProtKB=O00268,HUMAN|HGNC=9189|UniProtKB=P19387,HUMAN|HGNC=11545|UniProtKB=Q16…	General transcription regulation	19	53	367
P00022	HUMAN|HGNC=12511|UniProtKB=P17480,HUMAN|HGNC=20454|UniProtKB=Q9H9Y6,HUMAN|HGNC=17928|UniProtKB=Q9P2W1,HUMAN|HGNC=11589|UniProtKB=P62380	General transcription by RNA polymerase I	16	23	135
P00021	HUMAN|HGNC=9658|UniProtKB=P29350,HUMAN|HGNC=6880|UniProtKB=Q13164,HUMAN|HGNC=9871|UniProtKB=P20936,HUMAN|HGNC=9299|UniProtKB=P67775,HUMAN|HGNC=6872|UniProtKB=P53779,HUMAN|HGNC=6843|UniProtKB=P46734,HUMAN|HGNC=6877|UniProtKB=P27361,HUMAN|HGNC=8630|UniProtKB=P30086,HUMAN|HGNC=6846|UniProtKB=P52564,HUMAN|HGNC=6856|UniProtKB=Q9Y6R4,HUMAN|HGNC=8972|UniProtKB=O00750,HUMAN|HGNC=9065|UniProtKB=P19174,HUM…	FGF signaling pathway	26	211	1174
P00020	HUMAN|HGNC=6637|UniProtKB=P20700,HUMAN|HGNC=6857|UniProtKB=Q99683,HUMAN|HGNC=6638|UniProtKB=Q03252,HUMAN|HGNC=3573|UniProtKB=Q13158,HUMAN|HGNC=391|UniProtKB=P31749,HUMAN|HGNC=11920|UniProtKB=P25445,HUMAN|HGNC=11936|UniProtKB=P48023,HUMAN|HGNC=6872|UniProtKB=P53779,HUMAN|HGNC=1507|UniProtKB=P55212,HUMAN|HGNC=6204|UniProtKB=P05412,HUMAN|HGNC=1474|UniProtKB=P40121,HUMAN|HGNC=1504|UniProtKB=P42574,HU…	FAS signaling pathway	31	45	244
P00019	HUMAN|HGNC=9391|UniProtKB=P13861,HUMAN|HGNC=9605|UniProtKB=P35354,HUMAN|HGNC=6880|UniProtKB=Q13164,HUMAN|HGNC=9380|UniProtKB=P17612,HUMAN|HGNC=391|UniProtKB=P31749,HUMAN|HGNC=9388|UniProtKB=P10644,HUMAN|HGNC=4390|UniProtKB=P50148,HUMAN|HGNC=6877|UniProtKB=P27361,HUMAN|HGNC=9441|UniProtKB=P51817,HUMAN|HGNC=9035|UniProtKB=P47712,HUMAN|HGNC=9390|UniProtKB=P31321,HUMAN|HGNC=239|UniProtKB=P40145,HUMAN…	Endothelin signaling pathway	27	148	746
P00018	HUMAN|HGNC=11366|UniProtKB=P42229,HUMAN|HGNC=6880|UniProtKB=Q13164,HUMAN|HGNC=9871|UniProtKB=P20936,HUMAN|HGNC=29869|UniProtKB=P98077,HUMAN|HGNC=3431|UniProtKB=P21860,HUMAN|HGNC=9299|UniProtKB=P67775,HUMAN|HGNC=6872|UniProtKB=P53779,HUMAN|HGNC=6843|UniProtKB=P46734,HUMAN|HGNC=6877|UniProtKB=P27361,HUMAN|HGNC=8630|UniProtKB=P30086,HUMAN|HGNC=6846|UniProtKB=P52564,HUMAN|HGNC=6856|UniProtKB=Q9Y6R4,H…	EGF receptor signaling pathway	28	249	1199
P00017	HUMAN|HGNC=4764|UniProtKB=P84243,HUMAN|HGNC=9970|UniProtKB=P35250,HUMAN|HGNC=9973|UniProtKB=P40937,HUMAN|HGNC=4778|UniProtKB=Q16695,HUMAN|HGNC=9971|UniProtKB=P40938,HUMAN|HGNC=9370|UniProtKB=P49643,HUMAN|HGNC=10290|UniProtKB=P15927,HUMAN|HGNC=18518|UniProtKB=O75792	DNA replication	18	56	281
P00016	HUMAN|HGNC=705|UniProtKB=O15144,HUMAN|HGNC=1874|UniProtKB=P23528,HUMAN|HGNC=20234|UniProtKB=Q9UI08,HUMAN|HGNC=20778|UniProtKB=P07437,HUMAN|HGNC=2876|UniProtKB=O60610,HUMAN|HGNC=143|UniProtKB=P68032,HUMAN|HGNC=16061|UniProtKB=Q9NQU5,HUMAN|HGNC=706|UniProtKB=O15145,HUMAN|HGNC=130|UniProtKB=P62736,HUMAN|HGNC=9802|UniProtKB=P15153,HUMAN|HGNC=704|UniProtKB=O15143,HUMAN|HGNC=10252|UniProtKB=O75116,HUMA…	Cytoskeletal regulation by Rho GTPase	20	156	870
P00015	HUMAN|HGNC=8845|UniProtKB=O15534,HUMAN|HGNC=2384|UniProtKB=Q16526	Circadian clock system	14	18	93
P00014	HUMAN|HGNC=5007|UniProtKB=Q01581,HUMAN|HGNC=3631|UniProtKB=P14324,HUMAN|HGNC=7530|UniProtKB=Q03426,HUMAN|HGNC=6708|UniProtKB=P48449,HUMAN|HGNC=7529|UniProtKB=P53602	Cholesterol biosynthesis	11	17	110
P00013	HUMAN|HGNC=1589|UniProtKB=P24864,HUMAN|HGNC=1596|UniProtKB=O75909,HUMAN|HGNC=1582|UniProtKB=P24385,HUMAN|HGNC=9561|UniProtKB=P55036,HUMAN|HGNC=1579|UniProtKB=P14635,HUMAN|HGNC=10291|UniProtKB=P35244,HUMAN|HGNC=9569|UniProtKB=Q9UL46,HUMAN|HGNC=19989|UniProtKB=Q9UJX6,HUMAN|HGNC=3115|UniProtKB=O00716,HUMAN|HGNC=1771|UniProtKB=P24941	Cell cycle	12	30	149
P00012	HUMAN|HGNC=3431|UniProtKB=P21860,HUMAN|HGNC=9642|UniProtKB=P18031,HUMAN|HGNC=12841|UniProtKB=P07947,HUMAN|HGNC=11283|UniProtKB=P12931,HUMAN|HGNC=6735|UniProtKB=P07948,HUMAN|HGNC=4041|UniProtKB=Q9NPG1,HUMAN|HGNC=130|UniProtKB=P62736,HUMAN|HGNC=12774|UniProtKB=P04628,HUMAN|HGNC=6551|UniProtKB=Q9UJU2,HUMAN|HGNC=4037|UniProtKB=P06241,HUMAN|HGNC=2459|UniProtKB=P19784,HUMAN|HGNC=4043|UniProtKB=Q13467,H…	Cadherin signaling pathway	16	220	1105
P00011	HUMAN|HGNC=3551|UniProtKB=P00740,HUMAN|HGNC=9051|UniProtKB=P00750,HUMAN|HGNC=8583|UniProtKB=P05121,HUMAN|HGNC=3537|UniProtKB=P25116,HUMAN|HGNC=3546|UniProtKB=P00451,HUMAN|HGNC=7|UniProtKB=P01023,HUMAN|HGNC=11760|UniProtKB=P10646,HUMAN|HGNC=3540|UniProtKB=Q96RI0,HUMAN|HGNC=620|UniProtKB=P05067,HUMAN|HGNC=11784|UniProtKB=P07204,HUMAN|HGNC=3530|UniProtKB=P00748,HUMAN|HGNC=3544|UniProtKB=P08709,HUMAN…	Blood coagulation	59	49	211
P00010	HUMAN|HGNC=1699|UniProtKB=P40259,HUMAN|HGNC=9316|UniProtKB=P48454,HUMAN|HGNC=9658|UniProtKB=P29350,HUMAN|HGNC=7797|UniProtKB=P25963,HUMAN|HGNC=6872|UniProtKB=P53779,HUMAN|HGNC=6877|UniProtKB=P27361,HUMAN|HGNC=6204|UniProtKB=P05412,HUMAN|HGNC=6735|UniProtKB=P07948,HUMAN|HGNC=3955|UniProtKB=P42685,HUMAN|HGNC=12657|UniProtKB=P15498,HUMAN|HGNC=9802|UniProtKB=P15153,HUMAN|HGNC=1452|UniProtKB=P27482,HU…	B cell activation	37	80	442
P00009	HUMAN|HGNC=8972|UniProtKB=O00750,HUMAN|HGNC=9802|UniProtKB=P15153,HUMAN|HGNC=9065|UniProtKB=P19174,HUMAN|HGNC=13658|UniProtKB=Q9HB63,HUMAN|HGNC=8030|UniProtKB=O00634	Axon guidance mediated by netrin	11	48	237
P00008	HUMAN|HGNC=9802|UniProtKB=P15153,HUMAN|HGNC=76|UniProtKB=P00519,HUMAN|HGNC=2561|UniProtKB=P61073,HUMAN|HGNC=13658|UniProtKB=Q9HB63,HUMAN|HGNC=8030|UniProtKB=O00634,HUMAN|HGNC=688|UniProtKB=Q9H4E5	Axon guidance mediated by Slit/Robo	14	39	182
P00007	HUMAN|HGNC=9103|UniProtKB=O43157,HUMAN|HGNC=9802|UniProtKB=P15153,HUMAN|HGNC=4037|UniProtKB=P06241,HUMAN|HGNC=667|UniProtKB=P61586,HUMAN|HGNC=3013|UniProtKB=Q14117,HUMAN|HGNC=8004|UniProtKB=O14786,HUMAN|HGNC=3955|UniProtKB=P42685	Axon guidance mediated by semaphorins	14	26	142
P00006	HUMAN|HGNC=9437|UniProtKB=P19525,HUMAN|HGNC=11917|UniProtKB=P20333,HUMAN|HGNC=6880|UniProtKB=Q13164,HUMAN|HGNC=949|UniProtKB=Q16611,HUMAN|HGNC=3573|UniProtKB=Q13158,HUMAN|HGNC=6766|UniProtKB=Q8WXG6,HUMAN|HGNC=11906|UniProtKB=O14798,HUMAN|HGNC=786|UniProtKB=P18848,HUMAN|HGNC=11920|UniProtKB=P25445,HUMAN|HGNC=6872|UniProtKB=P53779,HUMAN|HGNC=6843|UniProtKB=P46734,HUMAN|HGNC=6877|UniProtKB=P27361,HU…	Apoptosis signaling pathway	72	157	874
P00005	HUMAN|HGNC=9658|UniProtKB=P29350,HUMAN|HGNC=8800|UniProtKB=P01127,HUMAN|HGNC=29869|UniProtKB=P98077,HUMAN|HGNC=903|UniProtKB=O15169,HUMAN|HGNC=10776|UniProtKB=Q8N474,HUMAN|HGNC=3392|UniProtKB=P54762,HUMAN|HGNC=6872|UniProtKB=P53779,HUMAN|HGNC=2907|UniProtKB=P80370,HUMAN|HGNC=11283|UniProtKB=P12931,HUMAN|HGNC=667|UniProtKB=P61586,HUMAN|HGNC=6189|UniProtKB=Q9Y219,HUMAN|HGNC=4041|UniProtKB=Q9NPG1,HU…	Angiogenesis	77	232	1297
P00004	HUMAN|HGNC=3085|UniProtKB=P54792,HUMAN|HGNC=10064|UniProtKB=O75382,HUMAN|HGNC=9509|UniProtKB=P49810,HUMAN|HGNC=620|UniProtKB=P05067,HUMAN|HGNC=4041|UniProtKB=Q9NPG1,HUMAN|HGNC=12333|UniProtKB=P48995,HUMAN|HGNC=130|UniProtKB=P62736,HUMAN|HGNC=8747|UniProtKB=Q92824,HUMAN|HGNC=12774|UniProtKB=P04628,HUMAN|HGNC=6551|UniProtKB=Q9UJU2,HUMAN|HGNC=17016|UniProtKB=O95251,HUMAN|HGNC=7174|UniProtKB=P09237,H…	Alzheimer disease-presenilin pathway	70	185	1082
P00003	HUMAN|HGNC=9508|UniProtKB=P49768,HUMAN|HGNC=6880|UniProtKB=Q13164,HUMAN|HGNC=29509|UniProtKB=Q96BI3,HUMAN|HGNC=580|UniProtKB=O96018,HUMAN|HGNC=6872|UniProtKB=P53779,HUMAN|HGNC=188|UniProtKB=O14672,HUMAN|HGNC=6877|UniProtKB=P27361,HUMAN|HGNC=9509|UniProtKB=P49810,HUMAN|HGNC=620|UniProtKB=P05067,HUMAN|HGNC=216|UniProtKB=Q13443,HUMAN|HGNC=8747|UniProtKB=Q92824,HUMAN|HGNC=934|UniProtKB=Q9Y5Z0,HUMAN|H…	Alzheimer disease-amyloid secretase pathway	31	108	538
P00002	HUMAN|HGNC=12643|UniProtKB=P63027,HUMAN|HGNC=11131|UniProtKB=O00161,HUMAN|HGNC=9401|UniProtKB=Q02156	Alpha adrenergic receptor signaling pathway	6	31	164
P00001	HUMAN|HGNC=12643|UniProtKB=P63027,HUMAN|HGNC=11131|UniProtKB=O00161,HUMAN|HGNC=17793|UniProtKB=Q9UEU0	Adrenaline and noradrenaline biosynthesis	12	48	220
Supplementary Table 2: Significant DEGs based on the phenotypic relevance
